# Supplementary material for: The effect of polysaccharide-based hydrogels on the response of antigen-presenting cell lines to immunomodulators
Source: Royal Society of Chemistry journal article supplement (doi:10.1039/d1bm00854d), 2021-01-01
Supplement: d1bm00854d1.pdf [file d1bm00854d1.pdf]

# 1 The effect of polysaccharide-based hydrogels on the response of antigen 2 presenting cell lines to immunomodulators

3 Jin Teng CHUNG, Chi Ming Laurence LAU, Ying CHAU\*

4 Department of Chemical and Biological Engineering, The Hong Kong University of Science  
5 and Technology, Hong Kong, China.

6 \*corresponding author

## 7 [Supplementary Information](#)

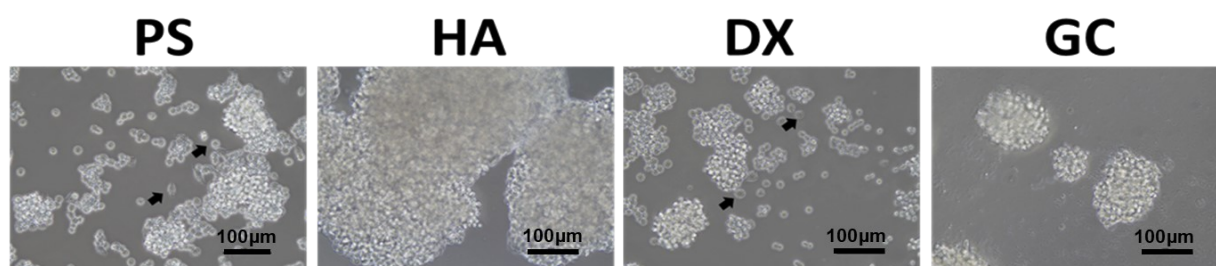

**S1. In vitro responses of RAW264.7 on culture dish versus polysaccharide-hydrogel beddings after LPS treatment.** 20X magnification, the scale bar corresponds to 100 μm). Arrows indicate adhered cells on culture surfaces.

8

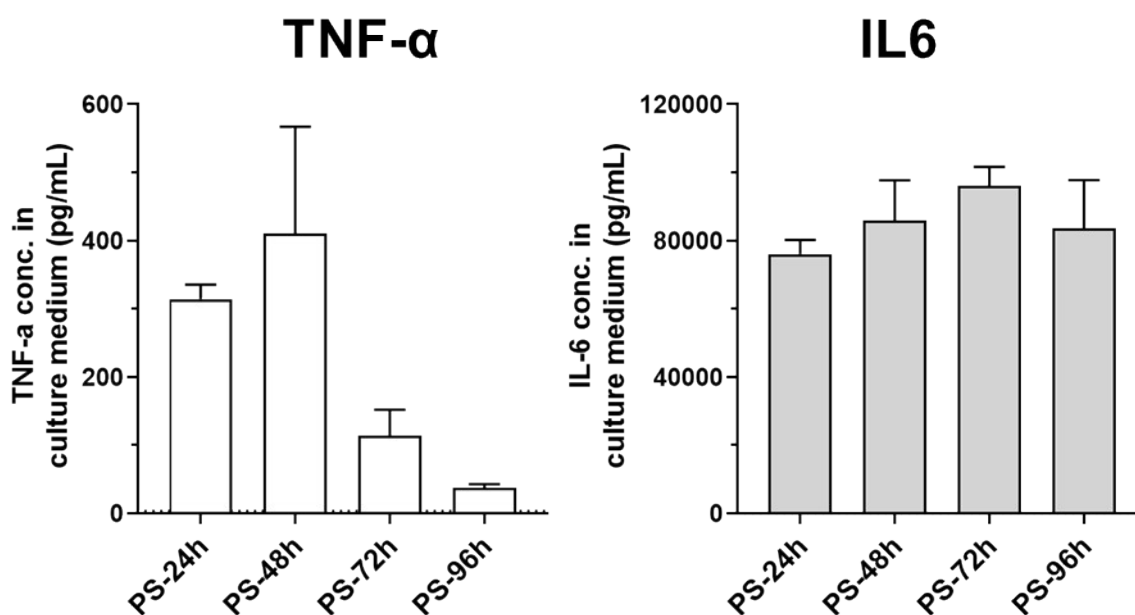

**S2. TNF-α and IL6 productions in JAWSII with time-dependent LPS treatment.** JAWSII cultured on PS was treated with 1 μg/mL LPS for 24, 48, 72 and 96 h. TNF-α production peaked at 48 h and decreased with increasing LPS treatment time. Conversely, IL6 production was induced post-24 h treatment and experienced no significant change with the increase in LPS treatment time. Hence, for the evaluation of tolerogenic JAWSII induction, cells were treated with LPS for 48 h and the production levels of TNF-α and IL6 were compared.

9
